# Supplementary material for: Genotypic Regulation of Aflatoxin Accumulation but Not Aspergillus Fungal Growth upon Post-Harvest Infection of Peanut (Arachis hypogaea L.) Seeds
Source: MDPI journal article supplement (doi:10.3390/toxins9070218), 2017-07-12
Supplement: s1 [file s1]

# Supplementary Materials: Genotypic Regulation of Aflatoxin Accumulation but not *Aspergillus* Fungal Growth upon Post-Harvest Infection of Peanut (*Arachis hypogaea* L.) Seeds

Walid Ahmed Korani, Ye Chu, Corley Holbrook, Josh Clevenger and Peggy Ozias-Akins

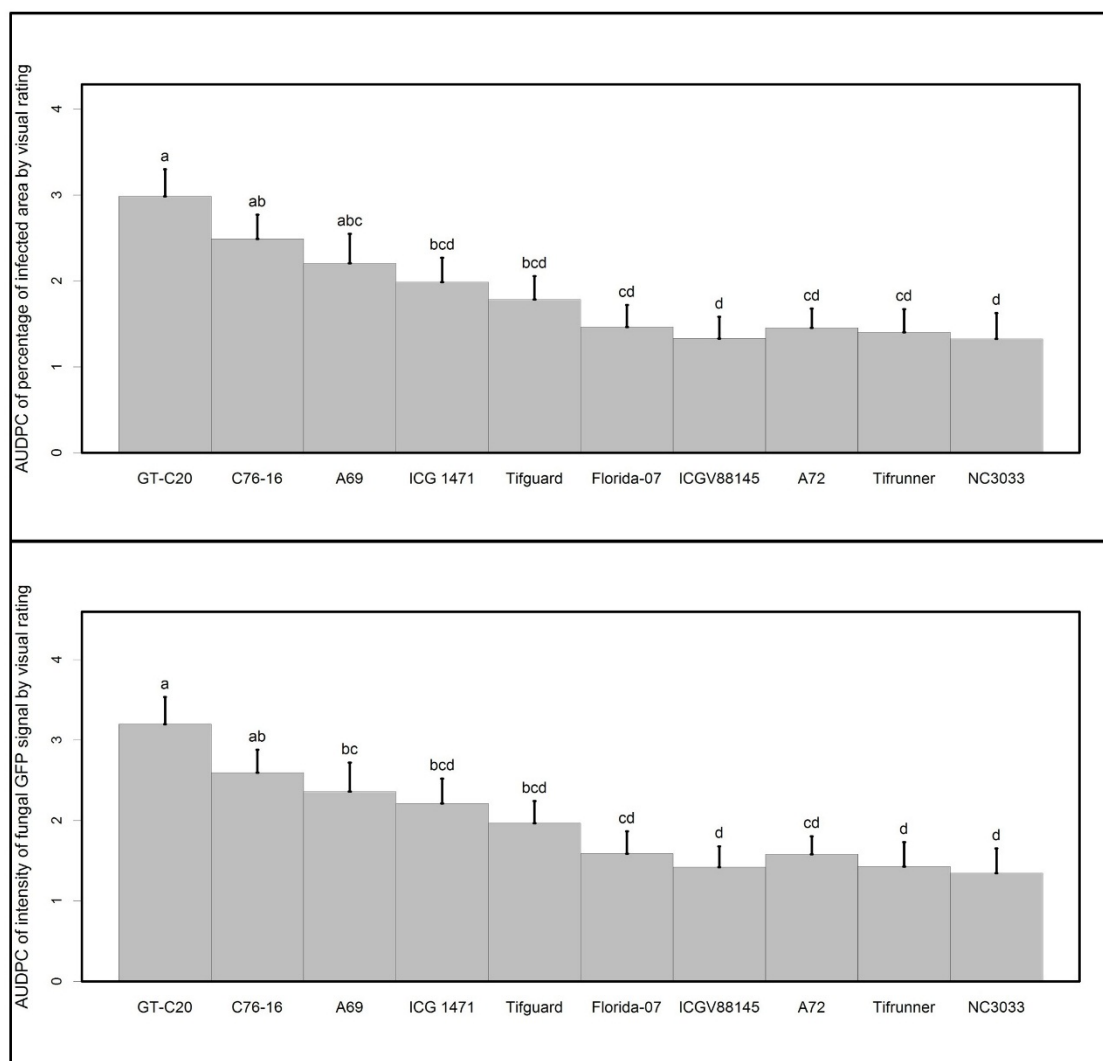

**Figure S1:** ANOVA analysis of log-transformed AUDPC values of the ten inoculated peanut genotypes. Percentage of infection area (upper panel) and the intensity of the fungal GFP signal (lower panel); Different letters indicate significant differences at  $p < 0.05$  level determined by Tukey's range test.
